# Supplementary material for: Management of children with febrile seizures: a Greek nationwide survey
Source: Springer Nature journal article supplement (doi:10.1007/s00431-023-05004-1), 2023-05-09
Supplement: MOESM1 [file 25336452]

## SURVEY ON THE MANAGEMENT OF FEBRILE SEIZURES BY PEDIATRICIANS IN GREECE

The 2<sup>nd</sup> Department of Pediatrics of the National and Kapodistrian University of Athens is conducting a voluntary and anonymous survey on the management of febrile seizures by pediatricians in Greece. This questionnaire should not take more than 3-5 minutes to complete.

### A. Demographics

#### 1. Sex

- Male  
 Female

#### 2. Where do you practice pediatrics (you can choose more than one)?

- Private Practice  
 Private Hospital  
 Public Hospital  
 Public Primary healthcare structure / Public Rural Hospital (primary care)  
 Retired / Not currently working

3. How many years have you been practicing pediatrics (Including residency) \_\_\_\_\_  
(if less than a year please enter 0)

4. Region of your practice: \_\_\_\_\_

### B. Febrile seizures Management

1. In the case of a child with known history of febrile seizures do you believe that 'aggressive' management of fever (e.g. regular administration of antipyretics) **prevents febrile seizures?**

- Yes  
 No  
 Maybe

2. Do you change in any way the advice that you give for fever management to parents of children with known history of febrile seizures, compared to the ones with no history of febrile seizures?

- Yes  
 No  
 Other (it depends) – Διευκρινίστε: \_\_\_\_\_

3. If you answered Yes/Other, in which way do you alter the advice:

- Measure temperature more often  Yes  No  
Give antipyretics at a lower temperature  Yes  No  
Administer antipyretics regularly (every X hours regardless of temperature)  Yes  No  
If yes, then at which temperature: \_\_\_\_\_ °C

## SURVEY ON THE MANAGEMENT OF FEBRILE SEIZURES BY PEDIATRICIANS IN GREECE

### 4. What Kind of advice do you give to parents of a subsequent episode of febrile seizure?

- «Put the child in supine position» Yes No
- «Give suppository antipyretic» Yes No
- «Don't put your hand in the child's mouth» Yes No
- «If you want, you can put a spoon in the child's mouth» Yes No
- 
- «Measure the duration of the episode» Yes No
- «Place the child under running water» Yes No
- «Give a facial stimulation» Yes No
- 
- «If after 3-5 minutes seizures continue administer suppository diazepam» Yes No
- «Bring child to me for assessment» Yes No
- «Go to the hospital» Yes No

### 5. After an episode of febrile seizure, when would you refer to a neurologist?

- Never for simple febrile seizures Yes No
- After the 1<sup>st</sup> episode of simple febrile seizure Yes No
- To patients with more than 1 episode of simple febrile seizure Yes No
- 
- After any episode of complex febrile seizures Yes No
- After any kind of febrile seizures if there is 1st degree relative with epilepsy Yes No
- If it is the parents' wish Yes No

### 6. Do you believe that hospitalization is needed in every consequent episode of simple febrile seizures?

- Yes
- No
- It depends / Other. Explain: \_\_\_\_\_

### 7. When do you inform parents on the existence of Febrile seizures?

- Only after the 1<sup>st</sup> episode
- In advance, all parents
- In advance only if there is family history

Comments

**Thank you for your time**
